# Supplementary material
Source: PubMed Central journal article supplement (PMC3604909)
Supplement: supp_12-10740_IOVS-12-10740-s01.pdf [file supp_12-10740_IOVS-12-10740-s01.pdf]

Supplemental Table 1. PCR primers for generation of lacritin hydrophobic or charge mutants.

| Mutant                                                                  | Primer sequence (5'-3')                                                                                                                                                                           | Tem-plate       |
|-------------------------------------------------------------------------|---------------------------------------------------------------------------------------------------------------------------------------------------------------------------------------------------|-----------------|
| L65S <i>f</i><br><i>r</i>                                               | CAGGAACTAAACCCAGCAAATCCATAGTGGAGAAAAGT<br>ACTTTTCTCCACTATGGATTTGCTGGGGTTTAGTTCTG                                                                                                                  | pLAC            |
| K66S <i>f</i><br><i>r</i>                                               | CAGGAACTAAACCCCTGAGCTCCATAGTGGAGAAAAGTATC<br>GATACTTTTCTCCACTATGGAGCTCAGGGGGTTTAGTTCTG                                                                                                            | pLAC            |
| K66S/E70S <i>f</i><br><i>r</i>                                          | CCCCTGAGCTCCATAGTGTGCAAAAAGTATCTTACTAACAGAACAAG<br>CTTGTTCTGTTAGTAAGATACTTTTCGACACTATGGAGCTCAGGGG                                                                                                 | K66S            |
| K66S/E70S/<br>K95S <i>f</i><br><i>r</i><br>/E99S <i>f</i><br><i>r</i>   | CACGGAGGCGTGCCAGGTGGAAGCCAATTCATCGAAAATGGAAGTG<br>CACTTCCATTTTCGATGAATTGGCTTCCACCTGGCACGCCTCCGTG<br>GGTGGAAGCCAATTCATCTCAAATGGAAGTGAATTTGCAC<br>GTGCAAATTCACTTCCATTTGAGATGAATTGGCTTCCACC          | K66S/<br>E70S   |
| K66S/E70S/<br>E103S <i>f</i><br><i>r</i><br>/K107S <i>f</i><br><i>r</i> | CAATTCATCGAAAATGGAAGTTCATTTGCACAAAATTACTGAAG<br>CTTCAGTAATTTTTGTGCAAATGAACTTCCATTTTCGATGAATTG<br>AATGGAAGTTCATTTGCACAAAGCTTACTGAAGAAATTCAGTCTA<br>TAGACTGAATTTCTTCAGTAAGCTTTGTGCAAATGAACTTCCATT   | K66S/<br>E70S/K |
| I68S <i>f</i><br><i>r</i>                                               | AACCCCTGAAATCCAGCGTGGAGAAAAGTATCTTA<br>TAAGATACTTTTCTCCACGCTGGATTTCAGGGGGTT                                                                                                                       | pLAC            |
| V69S <i>f</i><br><i>r</i>                                               | CCCCTGAAATCCATAAGCGAGAAAAGTATCTTACTAACAG<br>CTGTTAGTAAGATACTTTTCTCGCTTATGGATTTTCAGGGG                                                                                                             | pLAC            |
| E70S/E103S <i>f</i><br><i>r</i>                                         | CACGGAGGCGTGCCAGGTGGAAGCCAATTCATCGAAAATGGAAGTG<br>CACTTCCATTTTCGATGAATTGGCTTCCACCTGGCACGCCTCCGTG<br>CAATTCATCGAAAATGGAAGTTCATTTGCACAAAATTACTGAAG<br>CTTCAGTAATTTTTGTGCAAATGAACTTCCATTTTCGATGAATTG | pLac            |
| I73S <i>f</i><br><i>r</i>                                               | ATAGTGGAGAAAAGTAGCTTACTAACAGAACAAGCC<br>GGCTTGTCTGTTAGTAAGCTACTTTTCTCCACTAT                                                                                                                       | pLAC            |
| V91S <i>f</i><br><i>r</i>                                               | GGAATGCACGGAGGCTCGCCAGGTGGAAAACAA<br>TTGTTTTCCACCTGGCGAGCCTCCGTGCATTCC                                                                                                                            | pLAC            |
| V91S/L109S <i>f</i><br><i>r</i>                                         | AGTGAATTTGCACAAAATTATCGAAGAAATTCAGTCTATTA<br>TTTTAATAGACTGAATTTCTTCGATAATTTTTGTGCAAATTCCT                                                                                                         | V91S            |
| K95S <i>f</i><br><i>r</i>                                               | CACGGAGGCGTGCCAGGTGGAAGCCAATTCATCGAAAATGGAAGTG<br>CACTTCCATTTTCGATGAATTGGCTTCCACCTGGCACGCCTCCGTG                                                                                                  | pLAC            |
| K95S/E99S <i>f</i><br><i>r</i>                                          | CACGGAGGCGTGCCAGGTGGAAGCCAATTCATCGAAAATGGAAGTG<br>CACTTCCATTTTCGATGAATTGGCTTCCACCTGGCACGCCTCCGTG                                                                                                  | K95S            |
| K95S/E99S/E103<br>S /K107S <i>f</i><br><i>r</i>                         | AATGGAAGTTCATTTGCACAAAGCTTACTGAAGAAATTCAGTCTA<br>TAGACTGAATTTCTTCAGTAAGCTTTGTGCAAATGAACTTCCATT<br>CAATTCATCGAAAATGGAAGTTCATTTGCACAAAATTACTGAAG<br>CTTCAGTAATTTTTGTGCAAATGAACTTCCATTTTCGATGAATTG   | K95S/E<br>99S   |
| I98S <i>f</i><br><i>r</i>                                               | CCAGGTGAAAACAATTCTCCGAAAATGGAAGTGAATT<br>AATTCACTTCCATTTTCGGAGAATTGTTTTCCACCTGG                                                                                                                   | pLAC            |
| E99S <i>f</i><br><i>r</i>                                               | GGTGGAAGCCAATTCATCTCAAATGGAAGTGAATTTGCAC<br>GTGCAAATTCACTTCCATTTGAGATGAATTGGCTTCCACC                                                                                                              | pLAC            |
| E103S <i>f</i><br><i>r</i>                                              | CAATTCATCGAAAATGGAAGTTCATTTGCACAAAATTACTGAAG<br>CTTCAGTAATTTTTGTGCAAATGAACTTCCATTTTCGATGAATTG                                                                                                     | pLAC            |
| E103S/K107S <i>f</i><br><i>r</i>                                        | AATGGAAGTTCATTTGCACAAAGCTTACTGAAGAAATTCAGTCTA<br>TAGACTGAATTTCTTCAGTAAGCTTTGTGCAAATGAACTTCCATT                                                                                                    | E103S           |
| F104S <i>f</i>                                                          | GAAAATGGAAGTGAATCTGCACAAAATTACTGAAG                                                                                                                                                               | pLAC            |

|                                                                    |                                                                                                                                                               |       |
|--------------------------------------------------------------------|---------------------------------------------------------------------------------------------------------------------------------------------------------------|-------|
| <i>r</i>                                                           | CTTCAGTAATTTTTGTGCAGATTCACTTCCATTTTC                                                                                                                          |       |
| A105S <i>f</i><br><i>r</i>                                         | ATCGAAAATGGAAGTGAATTTTCACAAAATTACTGAAGAAATTC<br>GAATTTCTTCAGTAATTTTTGTGAAAATTCACTTCCATTTTCGAT                                                                 | pLAC  |
| L108S <i>f</i><br><i>r</i>                                         | GAATTTGCACAAAATCACTGAAGAAATTCAGTCTA<br>TAGACTGAATTTCTTCAGTGATTTTTGTGCAAATTC                                                                                   | pLAC  |
| L108S/L109S<br><i>f</i><br><i>r</i><br>/F112S <i>f</i><br><i>r</i> | AGTGAATTTGCACAAAATTATCGAAGAAATTCAGTCTATTA<br>TTTTAATAGACTGAATTTCTTCGATAATTTTTGTGCAAATTC<br>AAATCATGCAAGAAATCCAGTCTATTA<br>CCATGGTTTTAATAGACTGGATTTCTTGCATGATT | L108S |
| L109S <i>f</i><br><i>r</i>                                         | AGTGAATTTGCACAAAATTATCGAAGAAATTCAGTCTATTA<br>TTTTAATAGACTGAATTTCTTCGATAATTTTTGTGCAAATTC                                                                       | pLAC  |
| F112S <i>f</i><br><i>r</i>                                         | AAATCATGCAAGAAATCCAGTCTATTA<br>CCATGGTTTTAATAGACTGGATTTCTTGCATGATT                                                                                            | pLAC  |

Supplemental Table 2. PCR primers for pLAC codon mutagenesis

| Primer             | Primer sequence (5'-3')                                                                                                                                                    | Template   |
|--------------------|----------------------------------------------------------------------------------------------------------------------------------------------------------------------------|------------|
| 747576f<br>747576r | C ATA GTG GAG AAA AGT ATC <b>CTG CTG ACC</b> GAA CAA GCC CTT GCA<br>AAA GCA G<br>C TGC TTT TGC AAG GGC TTG TTC <b>GGT CAG CAG</b> GAT ACT TTT CTC<br>CAC TAT G             | pLAC       |
| 6264f<br>6264r     | CG ACC TCA AGC AGG CAG GAA <b>CTG AAC CCG</b> CTG AAA TCC ATA<br>GTG GAG AA<br>TT CTC CAC TAT GGA TTT CAG <b>CGG GTT CAG</b> TTC CTG CCT GCT TGA<br>GGT CG                 | lacrt-RC01 |
| 3456f<br>3456r     | GT CCA GCA GAA CCA GCT TCA <b>CCG CCG</b> GAA ACA ACC ACA ACA<br>GCC CAG GAG<br>CAC CTG GGC TGT TGT GGT GTG <b>TTC CCG CCG</b> TGA AGC TGG TTC<br>TGC TGG AC               | lacrt-RC02 |
| 5154f<br>5154r     | G GCG GCA GCA GTT CAG <b>GGC</b> ACA GCC AAA GTA ACC TCA AGC<br>AGG CAG GAA<br>G TTC CTG CCT GCT TGA GGT GAC <b>TTT GGC</b> TGT <b>GCC</b> CTG AAC TGC<br>TGC CGC C        | lacrt-RC03 |
| 114115f<br>114115r | A TTA CTG AAG AAA TTC AGT <b>CTG CTG</b> AAA CCA TGG GCA TGC TTT<br>GCC AAG G<br>C CTT GGC AAA GCA TGC CCA TGG TTT <b>CAG CAG</b> ACT GAA TTT CTT<br>CAG TAA               | lacrt-RC04 |
| 37940f<br>37940r   | AA CCA GCT TCA CCG CCG GAA <b>ACC ACC ACC</b> ACC GCC CAG GAG<br>ACT TCG GCG<br>CGC CGA AGT CTC CTG GGC <b>GGT GGT GGT GGT</b> TTC CGG CGG TGA<br>AGC TGG TT               | lacrt-RC05 |
| 8486f<br>8486r     | CAA GCC CTT GAC AAA GAC <b>GGC</b> AAA <b>GGC</b> ATG CAC GGA GGC GTG<br>CCA<br>TGG CAC GCC TCC GTG CAT <b>GCC</b> TTT <b>GCC</b> GTC TTT GTC AAG GGC<br>TTG               | lacrt-RC06 |
| 108110f<br>108110r | GGA AGT GAA TTT GCA CAA AAA <b>CTG CTG</b> AAA AAA TTC AGT CTG<br>CTG AAA<br>TTT CAG CAG ACT GAA TTT <b>TTT CAG CAG</b> TTT TTG TGC AAA TTC ACT<br>TCC                     | lacrt-RC06 |
| 59f<br>59r         | GCC AAA GTC ACC TCA AGC <b>CGT</b> CAG GAA CTG AAC CCG CTG AAA<br>TTT CAG CGG GTT CAG TTC CTG <b>ACG</b> GCT TGA GGT GAC TTT GGC                                           | lacrt-RC06 |
| 6870f<br>6870r     | CTG AAC CCG CTG AAA <b>ATT</b> GTG GAA AAA AGT ATC CTG CTG ACC<br>GGT CAG CAG GAT ACT TTT <b>TTC</b> CAC <b>AAT</b> TTT CAG CGG GTT CAG                                    | lacrt-RC07 |
| 4344f<br>4344r     | ACC ACA ACA GCC CAG GAA <b>ACC</b> TCG GCG GCA GCA GTT CAG GGG<br>CCC CTG AAC TGC TGC CGC CGA <b>GGT</b> TTC CTG GGC TGT TGT GGT                                           | lacrt-RC09 |
| 9294f<br>9294r     | GGC ATG CAC GGA GGC GTG <b>CCG</b> GGT <b>GGC</b> AAA CAA TTC ATC GAA<br>AAT GGA AG<br>CT TCC ATT TTC GAT GAA TTG TTT <b>GCC</b> ACC <b>CGG</b> CAC GCC TCC GTG<br>CAT GCC | lacrt-RC10 |
| 1720f<br>1720r     | GAT CCT GCC CAG GAA GCT <b>GGC</b> ACC TCT AAA <b>CCT</b> AAT GAA GAG<br>AC TCA GG<br>CC TGA GAT CTC TTC <b>ATT</b> AGG TTT AGA GGT <b>GCC</b> AGC TTG CTG<br>GGC AGG ATC  | lacrt-RC11 |
| 101f<br>101r       | CAA TTC ATC GAA AAT <b>GGC</b> AGT GAA TTT GCA CAA AAA CTG CTG<br>CAG CAG TTT TTG TGC AAA TTC ACT <b>GCC</b> ATT TTC GAT GAA TTG                                           | lacrt-RC12 |

Supplemental Table 3. Progressive pLAC coding sequence mutagenesis

| Construct        | Codons changed       | Unwanted mutations (codon #) | Total rare to common changes |
|------------------|----------------------|------------------------------|------------------------------|
| <i>pLAC-RC01</i> | 74, 75, 76           | 0                            | 3                            |
| <i>pLAC-RC02</i> | 62, 64               | 0                            | 5                            |
| <i>pLAC-RC03</i> | 34, 35, 36           | 0                            | 8                            |
| <i>pLAC-RC04</i> | 51, 54               | 0                            | 10                           |
| <i>pLAC-RC05</i> | 114, 115             | 0                            | 12                           |
| <i>pLAC-RC06</i> | 37, 39, 40           | 0                            | 15                           |
| <i>pLAC-RC07</i> | 59, 84, 86, 108, 110 | 2 (81, 83)                   | 20                           |
| <i>pLAC-RC08</i> | 68, 70               | 1 (83)                       | 22                           |
| <i>pLAC-RC09</i> | None                 | 0                            | 22                           |
| <i>pLAC-RC10</i> | 43, 44               | 0                            | 24                           |
| <i>pLAC-RC11</i> | 92, 94               | 0                            | 26                           |
| <i>pLAC-RC12</i> | 17, 20               | 0                            | 28                           |
| <i>pLAC-RC13</i> | 101                  | 0                            | 29                           |
